# Supplementary material for: Feature combination networks for the interpretation of statistical machine learning models: application to Ames mutagenicity
Source: PubMed Central journal article supplement (PMC3997921; doi:10.1186/1758-2946-6-8), 2014-03-25
Supplement: 1758-2946-6-8-S1.pdf [file 1758-2946-6-8-S1.pdf]

## Supplementary information

### KNIME single query interpretation workflow

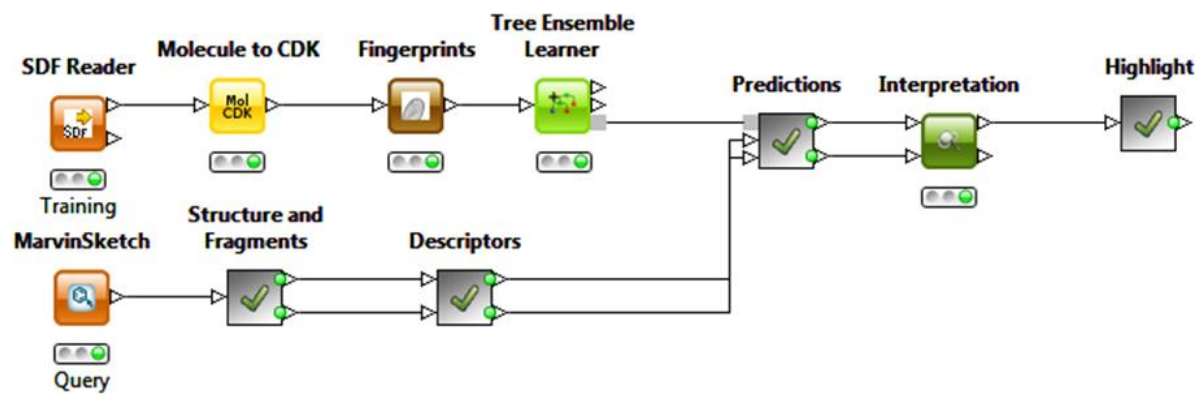

Meta nodes represent interchangeable components covering the titled functionality.

## Interpretation node view

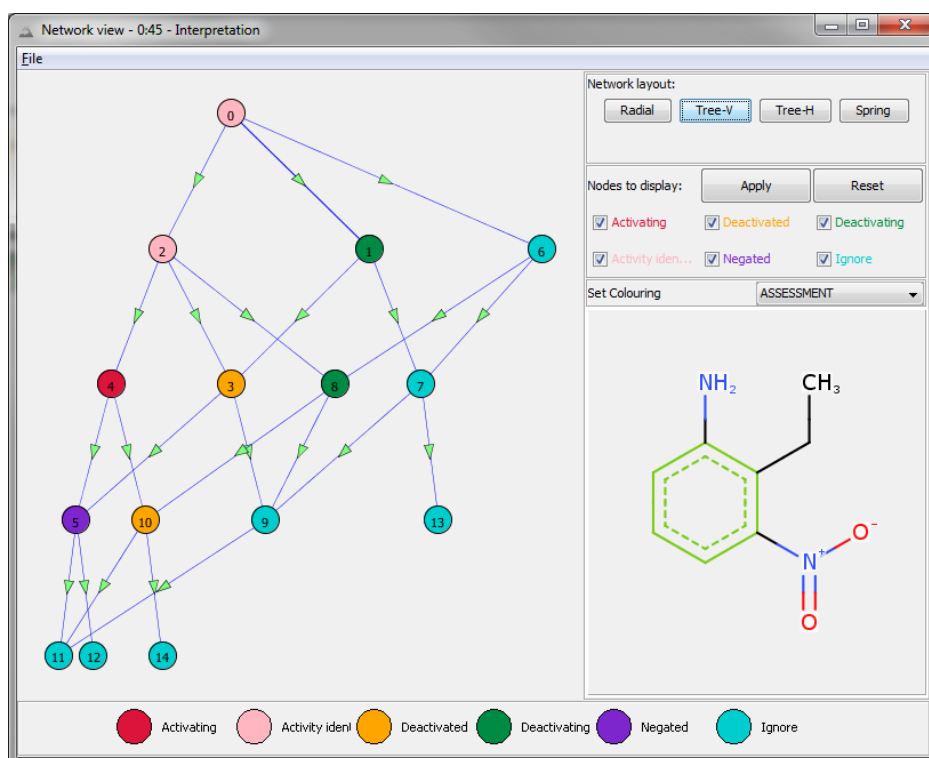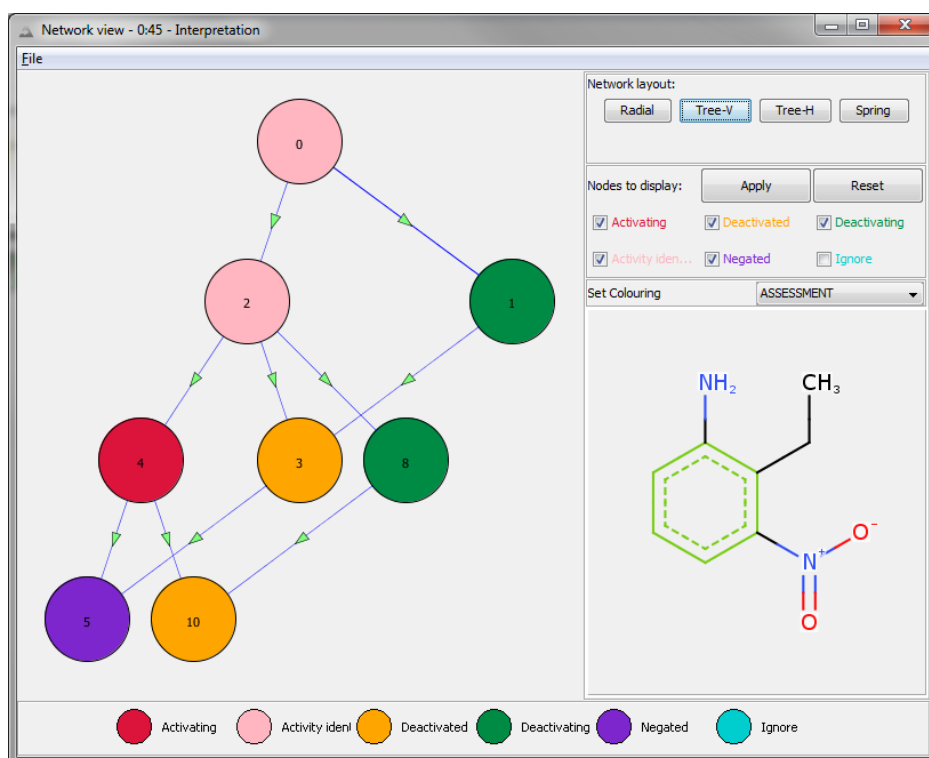

Example network for 2-ethyl-3-nitroaniline: upper image represents the full network drawn using the vertical tree layout from the Zest plugin and the lower image represents a filtered draw where nodes classified as ignore are not shown. Nodes are coloured by their assessment type; nodes can also be coloured by confidence in the prediction.

## Pseudo code for network assessment

```
assesNode(rootNode)
{
  if(node has child)
  {
    for(each child)
    {
      // All the children must be assessed
      if(child not assessed)
        assesNode(childNodeId);
    }

    if(predicted activity == ACTIVE)
    {
      if(hasPredictedInactiveAscendant)
      {
        // DEACTIVATED if a parent is predicted inactive
        assessment = hasPredictedInactiveParent ? DEACTIVATED : NEGATED;
      } else
      {
        // ACTIVATING only if a child isn't assessed as ACTIVATING or ACTIVITY IDENTIFIED
        assessment = hasActivatingOrActivityIdentifiedChild ? ACTIVITY_IDENTIFIED : ACTIVATING;
      }
    } else
    {
      // DEACTIVATING only if a child is predicted active
      assessment = hasPredictedActiveChild ? DEACTIVATING : IGNORE;
    }
  } else
  {
    // For nodes with no children
    if(predicted activity == ACTIVE)
    {
      if(hasPredictedInactiveAscendant)
      {
        // DEACTIVATED if parent is predicted inactive otherwise negated
        assessment = hasPredictedInactiveParent ? DEACTIVATED : NEGATED;
      } else
      {
        // ACTIVATING as no loss of activity in path to the root
        assessment = ACTIVATING;
      }
    } else
    {
      assessment = IGNORE;
    }
  }
}
```

## Cross validation results

| Algorithm | Descriptors  | AUC  | BAC  | SEN  | SPEC |
|-----------|--------------|------|------|------|------|
| SVM       | MACCS        | 0.86 | 0.80 | 0.82 | 0.78 |
|           | Pubchem      | 0.88 | 0.80 | 0.82 | 0.78 |
|           | CDK Standard | 0.86 | 0.80 | 0.82 | 0.78 |
|           | CDK Extended | 0.87 | 0.80 | 0.82 | 0.78 |
|           | ACF          | 0.87 | 0.80 | 0.82 | 0.77 |
| RF        | MACCS        | 0.88 | 0.81 | 0.83 | 0.78 |
|           | Pubchem      | 0.88 | 0.81 | 0.85 | 0.76 |
|           | CDK Standard | 0.86 | 0.79 | 0.82 | 0.77 |
|           | CDK Extended | 0.87 | 0.80 | 0.81 | 0.78 |
|           | ACF          | 0.87 | 0.79 | 0.80 | 0.78 |
| DT        | MACCS        | 0.79 | 0.76 | 0.79 | 0.72 |
|           | Pubchem      | 0.80 | 0.77 | 0.79 | 0.74 |
|           | CDK Standard | 0.76 | 0.74 | 0.77 | 0.71 |
|           | CDK Extended | 0.77 | 0.74 | 0.78 | 0.71 |
|           | ACF          | 0.78 | 0.74 | 0.79 | 0.71 |
| kNN       | MACCS        | 0.84 | 0.75 | 0.84 | 0.66 |
|           | Pubchem      | 0.83 | 0.76 | 0.82 | 0.69 |
|           | CDK Standard | 0.82 | 0.75 | 0.82 | 0.68 |
|           | CDK Extended | 0.83 | 0.75 | 0.81 | 0.70 |
|           | ACF          | 0.83 | 0.75 | 0.79 | 0.71 |

AUC = area under curve, BAC = balanced accuracy, SEN = sensitivity, SPEC = specificity
